# Supplementary material for: Relationship between Early Childhood Caries and Prolonged Coughing Episodes in a Cohort of Cambodian Children
Source: MDPI journal article supplement (doi:10.3390/ijerph191912842), 2022-10-07
Supplement: s1 [file s1]

## Supplementary Materials

**Table S1.** - Comparison of characteristics with complete and incomplete data <sup>a</sup>

|                                                      | <u>Full case</u><br>N = 1380 |                   | <u>Missing data</u><br>N = 323 |                   | P-Value <sup>b</sup> |
|------------------------------------------------------|------------------------------|-------------------|--------------------------------|-------------------|----------------------|
|                                                      | n/mean                       | Column %/sd       | n/mean                         | Column %/sd       |                      |
| Sex                                                  |                              |                   |                                |                   |                      |
| Male                                                 | 694                          | 50.3              | 179                            | 55.4              | 0.055                |
| Female                                               | 686                          | 49.7              | 144                            | 44.6              |                      |
| SES strata                                           |                              |                   |                                |                   |                      |
| Lowest                                               | 295                          | 21.4              | 35                             | 12.1              | <0.001               |
| Low                                                  | 338                          | 24.5              | 43                             | 14.9              |                      |
| Middle                                               | 338                          | 24.5              | 70                             | 24.2              |                      |
| High                                                 | 205                          | 14.9              | 61                             | 21.1              |                      |
| Highest                                              | 204                          | 14.8              | 80                             | 27.7              |                      |
| Maternal Characteristics                             |                              |                   |                                |                   |                      |
| Maternal age (years)                                 | 27.3                         | 6.2               | 27.0                           | 3.8               | 0.333                |
| Years of maternal education                          | 5.8                          | 3.3               | 6.6                            | 3.9               | <0.001               |
| No serious illness                                   | 1275                         | 94.2              | 305                            | 94.4              | 0.123                |
| One or more episodes of serious illness <sup>c</sup> | 105                          | 7.6               | 18                             | 5.6               |                      |
| Total                                                | 1380                         | 81.0 <sup>d</sup> | 323                            | 19.0 <sup>d</sup> |                      |

<sup>a</sup> Abbreviations: SES = Socio-economic status; ECC = Early Childhood Caries; ECC Activity = presence of lesion progression, either developing a dentine lesion or developing a pulpally involved lesion; FUp3 = Follow-up 3; N = Number of individuals in a group; SD = Standard deviation

<sup>b</sup> P-value for differences in proportions among groups was generated using the chi squared test. P-value for differences in means among groups was calculated using the standard t-test.

<sup>c</sup> Serious illness reported during morbidity questionnaires defined as an episode of illness where the parent took the child to see a doctor.

<sup>d</sup> Percentage presented is row percentage rather than column percentage as suggested in the column heading

**Table S2.** - Comparison of characteristics by attrition

|                                          | < 5 MU datapoints<br>N = 343 |          | ≥ 5 MU datapoints<br>N= 3009 |          | Overall<br>N = 3352 |             |
|------------------------------------------|------------------------------|----------|------------------------------|----------|---------------------|-------------|
|                                          | N/mean                       | Row %/sd | N/mean                       | Row %/sd | N/mean              | Column %/sd |
| Sex                                      |                              |          |                              |          |                     |             |
| Male                                     | 164                          | 9.7      | 1528                         | 90.3     | 1692                | 50.5        |
| Female                                   | 179                          | 10.8     | 1481                         | 89.2     | 1660                | 49.5        |
| SES strata <sup>b</sup>                  |                              |          |                              |          |                     |             |
| Lowest                                   | 70                           | 10.6     | 593                          | 89.4     | 663                 | 20.1        |
| Low                                      | 95                           | 12.7     | 652                          | 87.3     | 747                 | 22.7        |
| Middle                                   | 84                           | 10.8     | 691                          | 89.2     | 775                 | 23.5        |
| High                                     | 43                           | 8.5      | 463                          | 91.5     | 506                 | 15.4        |
| Highest                                  | 47                           | 7.8      | 553                          | 92.2     | 600                 | 18.2        |
| Parental illness report                  |                              |          |                              |          |                     |             |
| No serious illness                       | 322                          | 10.2     | 2820                         | 89.8     | 3142                | 93.7        |
| One or more episodes of serious illness  | 21                           | 10.0     | 189                          | 90.0     | 210                 | 6.3         |
| Maternal Characteristics                 |                              |          |                              |          |                     |             |
| Maternal age (years)                     | 27.0                         | 6.1      | 27.4                         | 6.2      | 27.2                | 6.2         |
| Years of maternal education <sup>c</sup> | 5.0                          | 3.7      | 5.8                          | 3.6      | 5.7                 | 3.6         |
| Total                                    | 343                          | 10.2     | 3009                         | 89.8     | 3352                | 100.0       |

<sup>a</sup> Abbreviations: MU = morbidity questionnaire; SES = Socio-economic status; N = Number of individuals in a group; SD = Standard deviation

<sup>b</sup>Data missing from 61 participants P-value = 0.030; chi-squared test for difference in Morbidity data points by SES strata

<sup>c</sup>P-value = <0.001; Fishers T-test for difference in years of maternal education by number of Morbidity data points.

**Table S3.** - Standardised raw treatment values for prolonged coughing by caries progression

|                                    | Standardized differences |          | Variance ratio |          |
|------------------------------------|--------------------------|----------|----------------|----------|
|                                    | Raw                      | Weighted | Raw            | Weighted |
| SES strata                         |                          |          |                |          |
| Lowest <sup>a</sup>                |                          |          |                |          |
| Low                                | -0.15                    | <0.001   | 0.81           | 1.00     |
| Medium                             | 0.10                     | <0.001   | 1.12           | 1.00     |
| High                               | 0.12                     | <0.001   | 1.24           | 1.00     |
| Highest                            | 0.18                     | <0.001   | 1.35           | 1.00     |
| Parental illness report            |                          |          |                |          |
| No serious illness <sup>a</sup>    |                          |          |                |          |
| Had an episode of serious illness  | -0.02                    | -0.01    | 0.95           | 0.98     |
| Sex                                |                          |          |                |          |
| Male <sup>a</sup>                  |                          |          |                |          |
| Female                             | <0.00                    | -0.01    | 1.00           | 1.00     |
| Height for age z-score at baseline | 0.12                     | <0.001   | 1.14           | 1.11     |
| Mothers age                        | 0.05                     | <0.001   | 0.95           | 1.00     |

<sup>a</sup> Reference category

**Table S4.** - Odds ratios, Average treatment effects and Risk Ratios for the relationship between caries progression and significant coughing where there was no caries at baseline <sup>a</sup>.

|                                          | Coefficient | 95% CI      |
|------------------------------------------|-------------|-------------|
| Logistic regression model for Cough >14d |             |             |
| Adjusted log regression                  | 1.30        | 0.90, 1.88  |
| IPW modelling                            |             |             |
| Average treatment effects                | 0.03        | -0.02, 0.08 |
| Coeff. (95% CI)                          |             |             |
| Risk Ratios                              | 1.19        | 0.87, 1.62  |
| E-values <sup>b</sup>                    |             |             |
| Treatment effect                         | 1.67        |             |
| Confidence interval                      | 1.15        |             |

<sup>a</sup> Number of observations = 1058; Number exposed = 323; Models controlled for the following confounders: for sex, age, maternal education, Socioeconomic Status, and Height for age Z-score and the report of significant illness as a covariate.

<sup>c</sup> E-value calculated as  $RR + \sqrt{RR * RR - 1}$
